# Supplementary material for: Fruit–Carrot-Based Smoothies as Innovative Products with a Complex Matrix of Bioactive Compounds Effected on Activities of Selected Digestive Enzymes and Cholinesterases In Vitro
Source: MDPI journal article supplement (doi:10.3390/antiox12040917), 2023-04-12
Supplement: s1 [file s1]

### Supplementary S1. Polyphenolic and carotenoid contents of carrot-based smoothies

| Sample | Fl3 1                    | Fl3 2                    | Fl3 3                              | Other Fl3                   | Total Fl3                      |                                   |                                    |                                   |                                    |                        |                                    |                                   |                                    |           |                |                |                   |      |                  |                                |                                | Other                             |                 |
|--------|--------------------------|--------------------------|------------------------------------|-----------------------------|--------------------------------|-----------------------------------|------------------------------------|-----------------------------------|------------------------------------|------------------------|------------------------------------|-----------------------------------|------------------------------------|-----------|----------------|----------------|-------------------|------|------------------|--------------------------------|--------------------------------|-----------------------------------|-----------------|
|        |                          |                          |                                    |                             |                                | PA 1                              | PA 2                               | PA 3                              | PA 4                               | PA 5                   | PA 6                               | PA 7                              | PA 8                               | PA 9      | PA 10          | PA 11          | P 12              | P 13 | PA               | Total PA                       |                                |                                   |                 |
| RJ-PC  | 26.23±0.56 <sub>b</sub>  | 2.37±0.0 <sub>5cde</sub> | 41.41±0. <sub>88<sup>b</sup></sub> | 14.07±0.30 <sub>f</sub>     | <b>84.08±1.78<sup>d</sup></b>  | 1.05±0.0 <sub>2<sup>c</sup></sub> | 35.89±0.7 <sub>6<sup>d</sup></sub> | 4.59±0.1 <sub>0<sup>c</sup></sub> | 2.75±0.06 <sub>d</sub>             | 2.40±0.05 <sub>d</sub> | 1.58±0.0 <sub>3<sup>g</sup></sub>  | 0.88±0 <sub>.02<sup>d</sup></sub> | 2.16±0.05 <sub>h<sup>j</sup></sub> | nd        | nd             | nd             | nd                | nd   | nd               | <b>58.65±2.24<sup>e</sup></b>  |                                |                                   |                 |
|        | 18.63±0.40 <sub>de</sub> | nd                       | nd                                 | 33.43±0.71 <sub>i</sub>     |                                | nd                                | 2 <sup>b</sup>                     | 1 <sup>b</sup>                    | 3.96±0.08 <sub>b<sup>d</sup></sub> |                        | 2.58±0.05 <sub>c</sub>             | 1.49±0.0 <sub>3<sup>g</sup></sub> | 0.99±0 <sub>.02<sup>bc</sup></sub> |           |                |                |                   |      |                  |                                | 2.68±0.06 <sub>f</sub>         | 1.72±0 <sub>.04<sup>b</sup></sub> | nd              |
| AJ-PC  | 18.04±0.38               | 2.22±0.0                 | nd                                 | 9.41±0.20 <sup>m</sup>      | <b>29.66±0.63<sup>n</sup></b>  | 1.07±0.0                          | 40.37±0.8                          | 4.09±0.0                          | 4.02±0.09 <sup>b</sup>             | 2.78±0.06 <sup>b</sup> | 1.65±0.0                           | 1.08±0                            | 2.28±0.05                          | nd        | nd             | nd             | nd                | nd   | 03 <sup>ef</sup> | <b>71.89±1.52<sup>c</sup></b>  |                                |                                   |                 |
| PJ-PC  | 18.92±0.40               | 4.12±0.0                 |                                    |                             |                                | nd                                | 18.30±0.39 <sub>b</sub>            | <b>41.34±0.88<sup>kl</sup></b>    |                                    |                        | 2 <sup>c</sup>                     | 6 <sup>c</sup>                    | 9 <sup>d</sup>                     |           |                |                |                   |      |                  |                                | 1.77±0.0                       | 0.96±0                            | 2.46±0.05       |
| SJ-PC  | 19.92±0.42 <sub>de</sub> | 9 <sub>cd</sub>          | nd                                 | 17.39±0.37 <sup>hj</sup>    | <b>37.32±0.79<sup>lm</sup></b> | 3 <sup>b</sup>                    | 5 <sup>d</sup>                     | 0 <sup>c</sup>                    | 3.43±0.07 <sub>c</sub>             | 2.85±0.06 <sub>b</sub> | 4 <sub>de</sub>                    | .02 <sub>cd</sub>                 | fgh                                | nd        | nd             | nd             | nd                | nd   | 07 <sup>a</sup>  | <b>63.92±3.36<sup>d</sup></b>  |                                |                                   |                 |
| SCJ-PC | 35.73±0.76 <sub>a</sub>  | 4.71±0.1                 | 58.60±1.                           |                             |                                | nd                                | 4 <sup>c</sup>                     | 1 <sup>b</sup>                    | d                                  | 3.10±0.07 <sub>c</sub> | 2.75±0.06 <sub>b<sup>c</sup></sub> | 1.61±0.0                          | 0.91±0                             | 2.56±0.05 | 5.21±0.1       | 0.99±0.0       | nd                | nd   | nd               | 03 <sup>d</sup>                | <b>80.54±2.71<sup>b</sup></b>  |                                   |                 |
| PC%100 | 9.08±0.19 <sub>j</sub>   | 53 <sup>b</sup>          | nd                                 | 26.54±0.57 <sub>f</sub>     | <b>60.66±1.29<sup>s</sup></b>  | 1.94±0.0                          | 72.18±1.5                          | 12.13±0.                          | 7.61±0.16 <sup>a</sup>             | 5.82±0.12 <sup>a</sup> | 3 <sub>g</sub>                     | .02 <sub>cd</sub>                 | fg                                 | nd        | 1 <sup>a</sup> | 2 <sup>a</sup> | nd                | nd   | 1.15±            | 2.68±0.                        |                                |                                   |                 |
|        | 7.46±0.16 <sub>k</sub>   | 25.04±0.                 | nd                                 |                             |                                | 4 <sup>a</sup>                    | 3 <sup>a</sup>                     | 26 <sup>a</sup>                   |                                    |                        | 0.65±0.0                           | 2.77±0.06                         | 0.95±0.0                           | 0.80±0.0  | 1.24±0.03      | 0.30±          |                   |      |                  |                                |                                |                                   |                 |
| RJ-WC  | 9.08±0.19 <sub>j</sub>   | 53 <sup>b</sup>          | nd                                 | 26.54±0.57 <sub>f</sub>     | <b>60.66±1.29<sup>s</sup></b>  | 1 <sup>e</sup>                    | n                                  | 2 <sup>ef</sup>                   | nd                                 | 0.33±0.01 <sub>g</sub> | 2 <sup>m</sup>                     | nd                                | l                                  | nd        | nd             | nd             | 0.01 <sup>a</sup> | nd   | nd               | <b>14.40±0.31<sup>a</sup></b>  |                                |                                   |                 |
| AJ-WC  | 7.46±0.16 <sub>k</sub>   | nd                       | nd                                 | 34.37±0.73 <sub>i</sub>     | <b>41.83±0.89<sup>kl</sup></b> | 0.52±0.0                          | 9.03±0.19                          | 0.47±0.0                          | nd                                 | 0.30±0.01 <sub>g</sub> | 0.88±0.0                           | 1.54±0.03                         | nd                                 | nd        | nd             | nd             | nd                | nd   | nd               | <b>21.13±0.45<sup>l</sup></b>  |                                |                                   |                 |
|        | 1 <sup>f</sup>           | h <sub>j</sub>           | 1 <sub>g</sub>                     | 1 <sup>f</sup>              |                                | h <sub>j</sub>                    | 1 <sub>g</sub>                     | 2 <sup>l</sup>                    |                                    |                        | nd                                 | k                                 |                                    |           |                |                |                   |      |                  |                                | nd                             | nd                                | nd              |
| PJ-WC  | 8.82±0.19 <sub>jk</sub>  | nd                       | nd                                 | 11.06±0.23 <sup>hijkl</sup> | <b>19.89±0.42<sup>p</sup></b>  | 0.66±0.0                          | 11.85±0.2                          | nd                                | 0.39±0.01 <sub>f</sub>             | 1.15±0.0               | 2.07±0.04                          | nd                                | j                                  | nd        | nd             | nd             | nd                | nd   | nd               | <b>25.65±0.54<sup>k</sup></b>  |                                |                                   |                 |
|        | 12.35±0.26               | nd                       | nd                                 | 20.85±0.44 <sup>b</sup>     |                                | <b>33.21±0.70<sup>m</sup></b>     | 1 <sup>e</sup>                     |                                   |                                    |                        | 5 <sub>fg</sub>                    |                                   |                                    |           |                |                |                   |      |                  |                                | nd                             | nd                                | g               |
| SJ-WC  | 10.00±0.21               | nd                       | nd                                 | 20.85±0.44 <sup>b</sup>     | <b>33.21±0.70<sup>m</sup></b>  | nd                                | l                                  | 3 <sup>e</sup>                    | nd                                 | g                      | 3 <sup>h</sup>                     | nd                                | j                                  | nd        | nd             | nd             | nd                | nd   | 02 <sup>f</sup>  | <b>20.79±0.44<sup>lm</sup></b> |                                |                                   |                 |
| SCJ-WC | 16.29±0.35               | nd                       | nd                                 | 60.84±1.29 <sub>b</sub>     | <b>70.84±1.50<sup>ef</sup></b> | 0.79±0.0                          | 7.29±0.15                          | nd                                | nd                                 | g                      | 1.06±0.0                           | 2.20±0.05                         | nd                                 | nd        | nd             | nd             | nd                | nd   | nd               | <b>28.99±0.62<sup>k</sup></b>  |                                |                                   |                 |
|        | 17.75±0.38               | 23.86±0.                 | nd                                 | 9.17±0.19 <sub>hj</sub>     |                                | <b>25.46±0.54<sup>ö</sup></b>     | 2 <sup>d</sup>                     |                                   |                                    |                        | j                                  | nd                                |                                    |           |                |                |                   |      |                  |                                | nd                             | g                                 | 2 <sub>jk</sub> |
| WC%100 | 17.75±0.38               | 23.86±0.                 | nd                                 | 9.17±0.19 <sub>hj</sub>     | <b>25.46±0.54<sup>ö</sup></b>  | 1.11±0.0                          | 5.20±0.11                          | nd                                | nd                                 | 0.67±0.01 <sup>e</sup> | 2.02±0.0                           | 0.28±0                            | 3.08±0.07                          | nd        | nd             | nd             | nd                | nd   | nd               | <b>25.01±0.53<sup>k</sup></b>  |                                |                                   |                 |
|        | 17.75±0.38               | 23.86±0.                 | nd                                 | 9.17±0.19 <sub>hj</sub>     |                                | <b>25.46±0.54<sup>ö</sup></b>     | 2 <sup>c</sup>                     |                                   |                                    |                        | k                                  | nd                                | nd                                 |           |                |                |                   |      |                  |                                | 0.95±0.0                       | 1.08±0.02                         |                 |
| RJ-YC  | 11.15±0.24               | 51 <sup>b</sup>          | nd                                 | 31.87±0.67 <sup>e</sup>     | <b>73.48±1.56<sup>e</sup></b>  | nd                                | m                                  | nd                                | nd                                 | nd                     | 2 <sup>kl</sup>                    | nd                                | m                                  | nd        | nd             | nd             | nd                | nd   | nd               | <b>19.16±0.41<sup>m</sup></b>  |                                |                                   |                 |
|        | 11.15±0.24               | nd                       | nd                                 | 33.38±0.70 <sub>i</sub>     |                                | <b>44.53±0.94<sup>jk</sup></b>    | 0.71±0.0                           | 8.57±0.18                         | nd                                 | nd                     | nd                                 | 0.81±0.0                          | 0.95±0.02                          | nd        | nd             | nd             | nd                | nd   | nd               | nd                             | <b>25.04±0.53<sup>k</sup></b>  |                                   |                 |
| AJ-YC  | 11.49±0.24               | nd                       | nd                                 | 13.55±0.29 <sub>j</sub>     | <b>25.07±0.53<sup>ö</sup></b>  | 2 <sup>de</sup>                   | h <sub>j</sub>                     | nd                                |                                    |                        |                                    | nd                                | nd                                 |           |                |                |                   |      |                  |                                |                                | 2 <sup>m</sup>                    | nd              |
| PJ-YC  | 15.12±0.32               | 1.67±0.0                 | nd                                 | 42.88±1.06 <sup>d</sup>     | <b>66.44±1.41<sup>fg</sup></b> | nd                                | 1 <sup>gh</sup>                    | nd                                | nd                                 | nd                     | 2 <sup>m</sup>                     | nd                                | n                                  | nd        | nd             | nd             | nd                | nd   | nd               | <b>26.65±0.57<sup>k</sup></b>  |                                |                                   |                 |
|        | 15.12±0.32               | 1.67±0.0                 | nd                                 | 42.88±1.06 <sup>d</sup>     |                                | <b>66.44±1.41<sup>fg</sup></b>    | nd                                 | 1 <sup>gh</sup>                   | nd                                 | nd                     | nd                                 | 2 <sup>m</sup>                    | nd                                 | n         | nd             | nd             | nd                | nd   | nd               | nd                             | 1.27±0.                        |                                   |                 |
| SJ-YC  | 55.92±1.                 | 19 <sup>a</sup>          | nd                                 | 57.29±1.22 <sup>c</sup>     | <b>113.22±2.40<sup>b</sup></b> | nd                                | ö                                  | 2 <sup>ef</sup>                   | nd                                 | nd                     | 1 <sup>n</sup>                     | nd                                | ö                                  | nd        | nd             | nd             | nd                | nd   | 03 <sup>ef</sup> | <b>21.70±0.46<sup>l</sup></b>  |                                |                                   |                 |
| SCJ-YC | 23.36±0.50               | nd                       | nd                                 | 6.48±0.14 <sup>h</sup>      |                                | <b>29.84±0.63<sup>n</sup></b>     | nd                                 | 5.51±0.12                         | 0.86±0.0                           | nd                     | nd                                 | 1 <sup>ö</sup>                    | nd                                 | ö         | nd             | nd             | nd                | nd   | nd               | nd                             | <b>30.39±0.64<sup>jk</sup></b> |                                   |                 |
| YC%100 | nd                       | 24.86±0.                 | nd                                 | 25.13±0.54 <sub>s</sub>     | <b>50.00±1.06<sup>hj</sup></b> | 1.91±0.0                          | 5.48±0.12                          | nd                                | nd                                 | f                      | 0.53±0.01 <sup>e</sup>             | 1.86±0.0                          | 1.98±0.04                          | nd        | nd             | nd             | nd                | nd   | nd               | <b>29.76±0.63<sup>k</sup></b>  |                                |                                   |                 |
| RJ-OC  | nd                       | 24.86±0.                 | nd                                 | 25.13±0.54 <sub>s</sub>     | <b>50.00±1.06<sup>hj</sup></b> | 4 <sup>a</sup>                    | k                                  |                                   |                                    |                        | nd                                 | nd                                | nd                                 |           |                |                |                   |      |                  |                                | 4 <sub>cd</sub>                | nd                                | j               |
|        | nd                       | 24.86±0.                 | nd                                 | 25.13±0.54 <sub>s</sub>     | <b>50.00±1.06<sup>hj</sup></b> | 0.70±0.0                          | 8.82±0.19                          | nd                                | nd                                 | nd                     | 0.89±0.0                           | nd                                | 4.51±0.10                          | nd        | nd             | nd             | nd                | nd   | nd               | <b>34.92±0.74<sup>hi</sup></b> |                                |                                   |                 |

|        |                        |                  |    |                           |                                |                 |                 |                 |    |    |                        |                  |           |           |    |    |    |    |                 |                                |
|--------|------------------------|------------------|----|---------------------------|--------------------------------|-----------------|-----------------|-----------------|----|----|------------------------|------------------|-----------|-----------|----|----|----|----|-----------------|--------------------------------|
|        |                        | 53 <sup>b</sup>  |    |                           |                                | 1 <sup>de</sup> | h <sup>j</sup>  |                 |    |    | 2 <sup>l</sup>         |                  | d         |           |    |    |    |    |                 |                                |
|        |                        |                  |    |                           |                                | 0.62±0.0        | 13.73±0.2       |                 |    |    | 0.94±0.0               |                  | 4.75±0.10 |           |    |    |    |    |                 |                                |
| AJ-OC  | nd                     | nd               | nd | 66.68±0.78 <sup>j</sup>   | <b>36.68±0.78<sup>lm</sup></b> | 1 <sup>e</sup>  | 9 <sup>ef</sup> | nd              | nd | nd | 2 <sup>kl</sup>        | nd               | cd        | nd        | nd | nd | nd | nd | nd              | <b>40.51±0.86<sup>g</sup></b>  |
|        |                        |                  |    |                           |                                |                 | 15.27±0.3       |                 |    |    | 0.98±0.0               |                  | 4.74±0.10 |           |    |    |    |    |                 |                                |
| PJ-OC  | nd                     | nd               | nd | 12.14±0.26 <sup>ghj</sup> | <b>12.14±0.26<sup>s</sup></b>  | nd              | 2 <sup>e</sup>  | nd              | nd | nd | 2 <sup>kl</sup>        | nd               | cd        | nd        | nd | nd | nd | nd | nd              | <b>42.54±0.90<sup>fg</sup></b> |
|        | 5.31±0.11              | 2.84±0.0         |    |                           |                                |                 | 7.41±0.16       | 1.10±0.0        |    |    | 1.06±0.0               |                  | 4.74±0.10 |           |    |    |    |    | 1.35±0.         |                                |
| SJ-OC  | <sup>mn</sup>          | 6 <sup>cde</sup> | nd | 28.59±0.60 <sup>a</sup>   | <b>36.74±0.78<sup>lm</sup></b> | nd              | j               | 2 <sup>e</sup>  | nd | nd | 2 <sup>jk</sup>        | nd               | cd        | nd        | nd | nd | nd | nd | 03 <sup>e</sup> | <b>38.63±0.82<sup>gh</sup></b> |
|        |                        | 57.57±1.         |    |                           |                                | 0.67±0.0        | 10.89±0.2       | 0.92±0.0        |    |    | 0.94±0.0               |                  | 5.05±0.11 |           |    |    |    |    |                 |                                |
| SCJ-OC | 4.39±0.09 <sup>n</sup> | 22 <sup>a</sup>  | nd | 65.97±1.40 <sup>a</sup>   | <b>127.93±2.71<sup>a</sup></b> | 1 <sup>e</sup>  | 3 <sup>gh</sup> | 2 <sup>ef</sup> | nd | nd | 2 <sup>kl</sup>        | nd               | bc        | nd        | nd | nd | nd | nd | nd              | <b>47.28±1.00<sup>f</sup></b>  |
|        | 6.11±0.13 <sup>l</sup> |                  |    |                           |                                | 1.30±0.0        | 15.71±0.3       | 0.66±0.0        |    |    | 0.43±0.01 <sup>f</sup> | 1.99±0.0         | 0.34±0    | 8.60±0.18 |    |    |    |    |                 |                                |
| OC%100 | <sup>m</sup>           | nd               | nd | 8.88±0.19 <sup>j</sup>    | <b>15.10±0.32<sup>r</sup></b>  | 3 <sup>b</sup>  | 3 <sup>e</sup>  | 1 <sup>fg</sup> | nd | g  | 4 <sup>bc</sup>        | .01 <sup>e</sup> | a         | nd        | nd | nd | nd | nd | nd              | <b>54.05±1.15<sup>e</sup></b>  |

Table 3. continue

| Sample        | F1                      | F2                      | F3     | Total F                       | A1                     | A2                      | A3                      | A4                      | A5                      | A6                     | A7                     | Total A                       | Procyanidin<br>s              | DP   | Total P                   | C1                     | C2                      | C3                     | C4                      | Total C                        |
|---------------|-------------------------|-------------------------|--------|-------------------------------|------------------------|-------------------------|-------------------------|-------------------------|-------------------------|------------------------|------------------------|-------------------------------|-------------------------------|------|---------------------------|------------------------|-------------------------|------------------------|-------------------------|--------------------------------|
| <b>RJ-PC</b>  | 4.64±0.10 <sup>de</sup> | nd                      | nd     | <b>4.64±0.10<sup>d</sup></b>  | 2.01±0.04 <sup>b</sup> | 12.83±0.27 <sup>d</sup> | 5.60±0.12 <sup>cd</sup> | nd                      | 1.25±0.03 <sup>de</sup> | nd                     | nd                     | <b>21.70±0.46<sup>d</sup></b> | <b>12.08±0.26<sup>f</sup></b> | 9.50 | <b>190.77<sup>d</sup></b> | nd                     | nd                      | nd                     | nd                      | <b>nd</b>                      |
| <b>AJ-PC</b>  | nd                      | nd                      | nd     | <b>nd</b>                     | 1.80±0.04 <sup>c</sup> | nd                      | 5.34±0.11 <sup>d</sup>  | 12.56±0.27 <sup>b</sup> | 1.11±0.02 <sup>de</sup> | nd                     | nd                     | <b>20.81±0.44<sup>d</sup></b> | <b>9.42±0.20<sup>g</sup></b>  | 6.46 | <b>150.96<sup>e</sup></b> | 0.03±0.00 <sup>a</sup> | 21.93±0.47 <sup>a</sup> | 0.27±0.01 <sup>a</sup> | nd                      | <b>22.22±0.47<sup>a</sup></b>  |
| <b>PJ-PC</b>  | nd                      | nd                      | nd     | <b>nd</b>                     | 1.21±0.03 <sup>d</sup> | nd                      | 4.76±0.10 <sup>e</sup>  | 10.77±0.23 <sup>c</sup> | 0.85±0.02 <sup>e</sup>  | nd                     | nd                     | <b>17.59±0.37<sup>e</sup></b> | <b>4.26±0.09<sup>l</sup></b>  | 6.31 | <b>135.56<sup>f</sup></b> | nd                     | nd                      | 0.10±0.00 <sup>b</sup> | 0.78±0.02 <sup>c</sup>  | <b>0.88±0.02<sup>def</sup></b> |
| <b>SJ-PC</b>  | 4.28±0.09 <sup>e</sup>  | nd                      | nd     | <b>4.28±0.09<sup>d</sup></b>  | 1.82±0.04 <sup>c</sup> | nd                      | 6.04±0.13 <sup>c</sup>  | 13.21±0.28 <sup>b</sup> | 8.43±0.18 <sup>c</sup>  | nd                     | nd                     | <b>29.51±1.63<sup>c</sup></b> | <b>16.75±0.36<sup>d</sup></b> | nd   | <b>177.64<sup>d</sup></b> | nd                     | nd                      | nd                     | 0.98±0.02 <sup>d</sup>  | <b>0.98±0.02<sup>de</sup></b>  |
| <b>SCJ-PC</b> | 8.48±0.18 <sup>a</sup>  | 30.31±0.64 <sup>a</sup> | nd     | <b>38.79±0.82<sup>c</sup></b> | 1.69±0.04 <sup>c</sup> | 21.98±0.47 <sup>b</sup> | 6.01±0.13 <sup>c</sup>  | 13.22±0.28 <sup>b</sup> | 1.04±0.02 <sup>e</sup>  | 7.42±0.16 <sup>b</sup> | nd                     | <b>51.35±3.09<sup>a</sup></b> | <b>25.56±0.54<sup>a</sup></b> | 1.59 | <b>173.29<sup>d</sup></b> | nd                     | nd                      | nd                     | 0.63±0.01 <sup>fg</sup> | <b>0.63±0.01<sup>efg</sup></b> |
| <b>PC%100</b> | nd                      | nd                      | nd     | <b>nd</b>                     | 2.65±0.06 <sup>a</sup> | nd                      | 8.30±0.18 <sup>b</sup>  | 17.30±0.37 <sup>a</sup> | 1.62±0.03 <sup>d</sup>  | nd                     | nd                     | <b>29.87±0.63<sup>c</sup></b> | <b>4.49±0.10<sup>l</sup></b>  | 4.01 | <b>278.06<sup>b</sup></b> | nd                     | nd                      | nd                     | 2.14±0.05 <sup>a</sup>  | <b>2.14±0.05<sup>b</sup></b>   |
| <b>RJ-WC</b>  | 4.39±0.09 <sup>de</sup> | nd                      | nd     | <b>4.39±0.09<sup>d</sup></b>  | nd                     | 13.82±0.29 <sup>c</sup> | nd                      | nd                      | nd                      | 1.39±0.03 <sup>c</sup> | 2.06±0.04 <sup>a</sup> | <b>17.27±0.37<sup>e</sup></b> | <b>11.56±0.25<sup>f</sup></b> | 3.54 | <b>108.28<sup>h</sup></b> | nd                     | nd                      | nd                     | nd                      | <b>nd</b>                      |
| <b>AJ-WC</b>  | nd                      | nd                      | nd     | <b>nd</b>                     | nd                     | nd                      | nd                      | nd                      | nd                      | nd                     | nd                     | <b>nd</b>                     | <b>8.18±0.17<sup>gh</sup></b> | 4.47 | <b>71.14<sup>k</sup></b>  | nd                     | nd                      | nd                     | nd                      | <b>nd</b>                      |
| <b>PJ-WC</b>  | nd                      | nd                      | nd     | <b>nd</b>                     | nd                     | nd                      | nd                      | nd                      | nd                      | nd                     | nd                     | <b>nd</b>                     | <b>5.12±0.11<sup>k</sup></b>  | 4.73 | <b>50.66<sup>n</sup></b>  | nd                     | nd                      | nd                     | nd                      | <b>nd</b>                      |
| <b>SJ-WC</b>  | 3.54±0.08 <sup>f</sup>  | nd                      | nd     | <b>3.54±0.08<sup>d</sup></b>  | nd                     | nd                      | nd                      | nd                      | 9.11±0.19 <sup>b</sup>  | nd                     | nd                     | <b>9.11±0.19<sup>f</sup></b>  | <b>15.77±0.33<sup>d</sup></b> | nd   | <b>82.42<sup>i</sup></b>  | nd                     | nd                      | nd                     | nd                      | <b>nd</b>                      |
| <b>SCJ-WC</b> | 8.38±0.                 | 31.49±                  | 43.21± | <b>83.08±1.</b>               | nd                     | 23.31                   | 9.34±0.2                | nd                      | nd                      | nd                     | nd                     | <b>32.65±0.</b>               | <b>22.62±0.48<sup>b</sup></b> | 1.60 |                           | nd                     | nd                      | nd                     | nd                      | <b>nd</b>                      |

|        |                        |                         |                         |                         |    |                                      |                |    |                         |                        |                        |                          |                         |      |                                           |    |    |                        |                         |                          |
|--------|------------------------|-------------------------|-------------------------|-------------------------|----|--------------------------------------|----------------|----|-------------------------|------------------------|------------------------|--------------------------|-------------------------|------|-------------------------------------------|----|----|------------------------|-------------------------|--------------------------|
|        | 18 <sup>a</sup>        | 0.67 <sup>a</sup>       | 0.92 <sup>a</sup>       | 76 <sup>a</sup>         |    | ±0.49 <sup>a</sup> <sub>b</sub>      | 0 <sup>a</sup> |    |                         |                        |                        | 69 <sup>b</sup>          |                         |      | 238.18 <sup>c</sup>                       |    |    |                        |                         |                          |
| WC%100 | nd                     | nd                      | nd                      | nd                      | nd | nd                                   | nd             | nd | nd                      | nd                     | nd                     | nd                       | 3.83±0.08 <sup>m</sup>  | nd   | 54.30 <sup>m</sup>                        | nd | nd | nd                     | nd                      | nd                       |
| RJ-YC  | 4.81±0.10 <sup>d</sup> | nd                      | nd                      | 4.81±0.10 <sup>d</sup>  | nd | 13.37±0.28 <sup>c</sup> <sub>d</sub> | nd             | nd | nd                      | 1.44±0.03 <sup>c</sup> | 1.96±0.04 <sup>a</sup> | 16.77±0.36 <sup>e</sup>  | 14.28±0.30 <sup>e</sup> | 4.39 | 128.50 <sup>f</sup>                       | nd | nd | nd                     | 0.45±0.01 <sup>h</sup>  | 0.45±0.01 <sup>fg</sup>  |
| AJ-YC  | nd                     | nd                      | nd                      | nd                      | nd | nd                                   | nd             | nd | nd                      | nd                     | nd                     | nd                       | 8.13±0.17 <sup>gh</sup> | 5.09 | 77.70 <sup>j</sup>                        | nd | nd | nd                     | 0.24±0.01 <sup>k</sup>  | 0.24±0.01 <sup>g</sup>   |
| PJ-YC  | nd                     | nd                      | nd                      | nd                      | nd | nd                                   | nd             | nd | nd                      | nd                     | nd                     | nd                       | 5.50±0.12 <sup>ik</sup> | 4.98 | 60.18 <sup>i</sup>                        | nd | nd | nd                     | 0.29±0.01 <sup>jk</sup> | 0.29±0.01 <sup>g</sup>   |
| SJ-YC  | 3.30±0.07 <sup>i</sup> | nd                      | nd                      | 3.30±0.07 <sup>d</sup>  | nd | nd                                   | nd             | nd | 8.85±0.19 <sup>bc</sup> | nd                     | nd                     | 8.85±0.19 <sup>f</sup>   | 15.66±0.33 <sup>d</sup> | nd   | 115.95 <sup>g</sup>                       | nd | nd | nd                     | 0.59±0.01 <sup>g</sup>  | 0.59±0.01 <sup>efg</sup> |
| SCJ-YC | 8.41±0.18 <sup>a</sup> | 30.73±0.65 <sup>a</sup> | 42.52±0.90 <sup>a</sup> | 81.65±1.73 <sup>a</sup> | nd | 22.56±0.48 <sup>b</sup>              | nd             | nd | nd                      | 8.30±0.18 <sup>a</sup> | nd                     | 30.86±0.65 <sup>bc</sup> | 23.08±0.49 <sup>b</sup> | 1.68 | 279.20 <sup>b</sup>                       | nd | nd | nd                     | 0.51±0.01 <sup>h</sup>  | 0.51±0.01 <sup>fg</sup>  |
| YC%100 | nd                     | nd                      | nd                      | nd                      | nd | nd                                   | nd             | nd | nd                      | nd                     | nd                     | nd                       | 2.59±0.05 <sup>n</sup>  | nd   | 62.19 <sup>i</sup>                        | nd | nd | nd                     | 0.31±0.03 <sup>c</sup>  | 0.31±0.03 <sup>cd</sup>  |
| RJ-OC  | 5.42±0.12 <sup>c</sup> | nd                      | nd                      | 5.42±0.12 <sup>d</sup>  | nd | 14.72±0.31 <sup>c</sup>              | nd             | nd | nd                      | 1.47±0.03 <sup>c</sup> | 2.08±0.04 <sup>a</sup> | 18.27±0.39 <sup>e</sup>  | 9.38±0.20 <sup>g</sup>  | 3.06 | 117.99 <sup>g</sup>                       | nd | nd | 0.06±0.00 <sup>c</sup> | 0.51±0.01 <sup>h</sup>  | 0.57±0.01 <sup>fg</sup>  |
| AJ-OC  | nd                     | nd                      | nd                      | nd                      | nd | nd                                   | nd             | nd | nd                      | nd                     | nd                     | nd                       | 7.86±0.17 <sup>h</sup>  | 4.74 | 85.05 <sup>i</sup>                        | nd | nd | nd                     | 0.33±0.01 <sup>j</sup>  | 0.33±0.01 <sup>g</sup>   |
| PJ-OC  | nd                     | nd                      | nd                      | nd                      | nd | nd                                   | nd             | nd | nd                      | nd                     | nd                     | nd                       | 5.71±0.12 <sup>j</sup>  | 4.33 | 60.39 <sup>i</sup>                        | nd | nd | nd                     | 0.37±0.01 <sup>j</sup>  | 0.37±0.01 <sup>g</sup>   |
| SJ-OC  | 4.16±0.09 <sup>e</sup> | nd                      | nd                      | 4.16±0.09 <sup>d</sup>  | nd | nd                                   | nd             | nd | 9.79±0.21 <sup>a</sup>  | nd                     | nd                     | 9.79±0.21 <sup>f</sup>   | 16.34±0.35 <sup>d</sup> | nd   | 105.66 <sup>h</sup>                       | nd | nd | nd                     | 0.66±0.01 <sup>g</sup>  | 0.66±0.01 <sup>fg</sup>  |
| SCJ-OC | 7.61±0.16 <sup>b</sup> | 27.40±0.58 <sup>b</sup> | 41.86±0.89 <sup>a</sup> | 76.87±1.63 <sup>b</sup> | nd | 24.23±0.51 <sup>a</sup>              | nd             | nd | nd                      | 8.48±0.18 <sup>a</sup> | nd                     | 32.70±0.69 <sup>b</sup>  | 20.01±0.42 <sup>c</sup> | 1.50 | 304.79 <sup>a</sup><br>71.83 <sup>k</sup> | nd | nd | nd                     | 0.70±0.01 <sup>ef</sup> | 0.70±0.01 <sup>fg</sup>  |
| OC%100 | nd                     | nd                      | nd                      | nd                      | nd | nd                                   | nd             | nd | nd                      | nd                     | nd                     | nd                       | 2.68±0.06 <sup>n</sup>  | nd   |                                           | nd | nd | nd                     | 1.65±0.04 <sup>b</sup>  | 1.65±0.04 <sup>c</sup>   |

Polyphenols. and carotenoids-mg/100 ml; values (mean of three replications) followed by the same letter within the same column were not significantly different (p ≤0.05) according to Tukey’s test. FL3 – flavan-3-ols; FL3 1 – procyanidin B2; FL3 2 – procyanidin B4; FL3 3 – (-)-epicatechin; PA – phenolic acids: PA 1 – gallic acid; PA 2 - 5-O-caffeoylquinic acid; PA 3 - 4-O-caffeoylquinic acid; PA 4 - ferulic acid-hexoside; PA 5 - 3-O-feruloylquinic acid; PA 6 - 4-O-feruloylquinic acid; PA 7 - caffeic acid –hexoside; PA 8 - di-ferulic acid derivative; PA 9 - dicaffeoylquinic acid; PA 10 - cis-5-p-coumaroylquinic acid; PA 11 – trans-5-p-coumaroylquinic acid; PA 12 - 3-O-caffeoylquinic acid; PA 13 - ferulic acid di-hexoside; F – flavonols, F 1 - quercetin-3-galactoside; F 2 – genistin; A - anthocyanins; A2 - cyanidin-3-O-xylosyl-glucosylgalactoside; A1 - cyanidin-3-O-xylosyl-galactoside; A3 - cyanidin-3-O-xylosyl-cinopoyl-glucosylgalactoside; A4 - cyanidin-3-O-xylosyl-glucosylgalactoside; A5 - cyanidin-3-O-xylosyl-p-coumaroylglucosyl-galactoside; A6 - cyanidin-3-O-glucosyl-rutinoside; A7 - cyanidin-3-arabinoside; TP – total polyphenolic compounds; C1 - α-cryptoxanthin (zeinoxanthin); C2 – β-carotene; C3 - pheophytin a; C4 – lutein; TC – total carotenoids detected.
